# Supplementary material
Source: PubMed Central journal article supplement (PMC6159928)
Supplement: NIHMS1505730-supplement-1.pdf [file NIHMS1505730-supplement-1.pdf]

**Table S1, related to Figure1.** Primers used for analyzing changes in lipogenic enzymes and ER stress in human biopsies

|        | Forward                 | Reverse                    |
|--------|-------------------------|----------------------------|
| PRL32  | TGTCGCAGAGTGTCTTCAA     | CCGTCCCTTCTCTTTCCTC        |
| CASP2  | CTACATGACCAGACCGCACA    | GTGCCACTACGCAGGAGTG        |
| DDIT3  | AGCCAAAATCAGAGCTGGAA    | TGGATCAGTCTGGAAAAGCA       |
| ATF6   | GCAGAAGGGGAGACACATTT    | TTGACATTTTTGGTCTTGTGG      |
| HSPA5  | CACAGTGGTGCCTACCAAGA    | TGTCTTTTGTGAGGGGTCTTT      |
| SREBF2 | GAGACAGCCAATGGCACA      | ATCTGAGGTTGCACCACTGAC      |
| HMGCR  | TGGTCCTAGAGCTTTCTCGTGAA | GGACCAAGCCTAAAGACATAATCATC |
| HMGCS  | CAGGGTCTGACCCCTTTG      | GAGAGA ACTGTGGTCTCCAGGT    |
