# Supplementary material
Source: PubMed Central journal article supplement (PMC6159928)
Supplement: NIHMS1505730-supplement-2.pdf [file NIHMS1505730-supplement-2.pdf]

**Table S2, related to Figure3.** Primers used for analyzing changes in gene expression in mouse liver or fat tissues

|               | Forward                 | Reverse                     |
|---------------|-------------------------|-----------------------------|
| Cyclophilin A | TGGAGAGCACCAAGACAGACA   | TGCCGGAGTCGACAATGAT         |
| Casp2         | CACCCTCTTCAAGCTTTTGG    | CGAAAACTCT TGGAGCTG         |
| uPA           | CTTCCCACTACCTTGGCTGG    | CCAGCCAAGGTAGTGGGAAG        |
| TNF $\alpha$  | ACGGCATGGATCTCAAAGAC    | AGATAGCAAATCGGCTGACG        |
| Adrp30        | GCACTGGCAAGTTCTACTGCA A | GTAGGTGAAGAGAACGGCCTT<br>GT |
| C/ebp $\beta$ | ACGACTTCCTCTCCGACCTCT   | CGAGGCTCACGTAACCGTAGT       |
| PPAR $\gamma$ | TGAAAGAAGCGGTGAACCACT G | TGGCATCTCTGTGTCAACCAT       |
| UCP1          | ACTGCCACACCTCCAGTCATT   | CTTTGCCTCACTCAGGATTGG       |
| $\alpha$ SMA  | G TTCAGTGGTGCCTCTGTCA   | ACTGGGACGACATGGAAAAG        |
| Tgfb1         | GGAGAGCCCTGGATACCAAC    | AAGTTGGCATGGTAGCCCTT        |
