# Supplementary material
Source: PubMed Central journal article supplement (PMC6159928)
Supplement: NIHMS1505730-supplement-3.pdf [file NIHMS1505730-supplement-3.pdf]

**Table S3, related to Figure6.** Primers used for generation of S1P, S2P or SCAP-deficient HEK293 cells

|      | Forward                       | Reverse                       |
|------|-------------------------------|-------------------------------|
| S1P  | CACCGGAACGAAAGACTTTTCGTT<br>G | AAACCAACGAAAAGTCTTTCGTT<br>C  |
| S2P  | CACCGCCGCCGTCCCCAACTGTAA<br>A | AAACTTTACAGTTGGGGACGGCG<br>GC |
| SCAP | CACCGGCTGCGTGAGAAGATATCT<br>C | AAACGAGATATCTTCTCACGCAGC<br>C |
