# Supplementary material
Source: PubMed Central journal article supplement (PMC6159928)
Supplement: NIHMS1505730-supplement-4.pdf [file NIHMS1505730-supplement-4.pdf]

**Table S4, related to Figure6.** Primers used for generation of catalytic inactive Casp2 and S1P mutants.

|                                | Forward                                        | Reverse                                                      |
|--------------------------------|------------------------------------------------|--------------------------------------------------------------|
| S1P                            | GCTAGCACCATGGCAATGAAGCTC<br>GTC AGC ACC TGG CT | GGATCCTCACACTGATGGGGTCCT<br>TGCAGGGTGGGC                     |
| Myc-S1P <sup>V214A/D218E</sup> | GCTGCTGTTTTTGAAGCTGGGCTCA<br>GTGAGAAG          | TTCAAAAACAGCAGCTCTGACATT<br>AGCACCTGT                        |
| Myc-S1P <sup>V721A/D725E</sup> | GCCATCTTCAGTGAGTGGTACAACA<br>CTTCTGTT          | CTCACTGAAGATGGCGAGGGAAA<br>GGCCATTGTC                        |
| Myc-S1P <sup>V735A/D739E</sup> | GCGAAGTTTTATGAGGAAAACACCA<br>GGCAGTGG          | CTCATAAACTTCGCTTTTCTCATA<br>ACAGAAGT                         |
| Myc-S1P <sup>V842A/D846E</sup> | GCGCTGTATGGAGAGTCCAAGTGC<br>TTGGATGAC          | CTCTCCATACAGCGCGATCCGGC<br>CTCCACCTTC                        |
| Casp2                          | GCTAGCACCATGGCAATGGCGGCG<br>CCGAGCGGGAGGTC     | GGATCCTCAAGCGTAATCTGGAAC<br>ATCGTATGGGTACGTGGGTGGGT<br>AGCCT |
| Casp2 <sup>C320G</sup>         | CAAGCAGGTCGTGGAGATGAGACA<br>GATAGAGGT          | TCCACGACCTGCTTGGATGAAGAA<br>CATTTTTGG                        |
