# Supplementary material
Source: PubMed Central journal article supplement (PMC6159928)

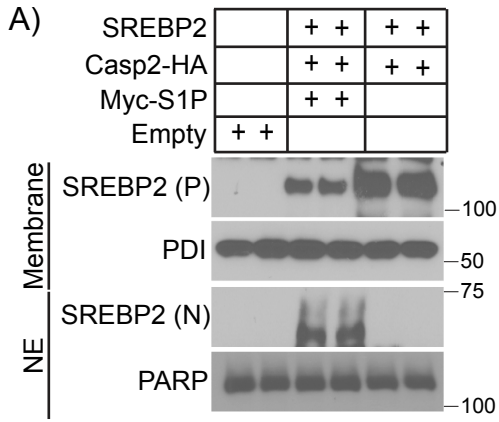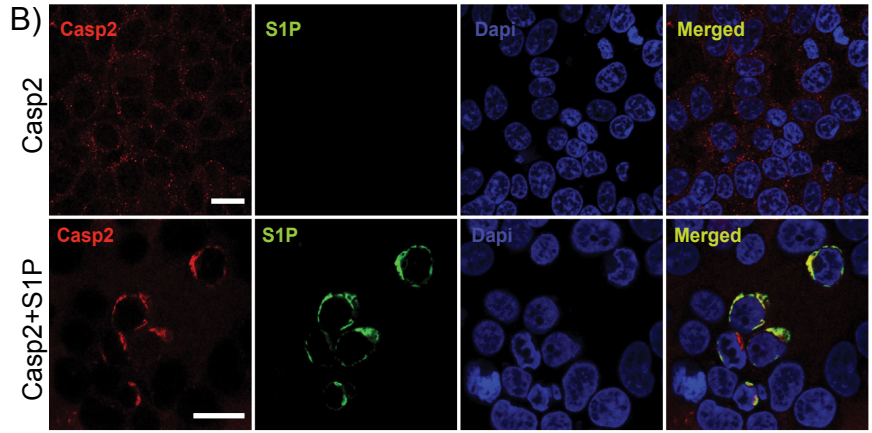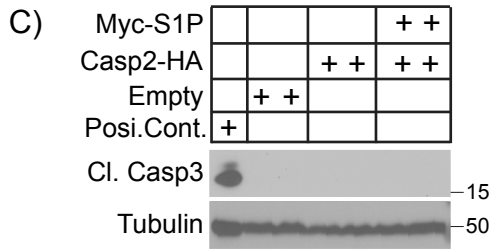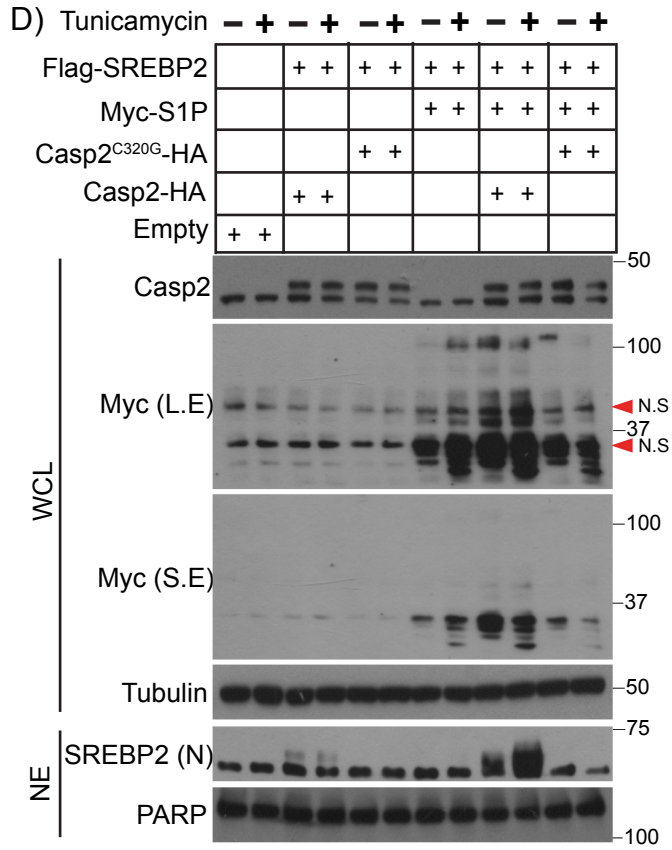

Supplement: NIHMS1505730-supplement-10.pdf [file NIHMS1505730-supplement-10.pdf]

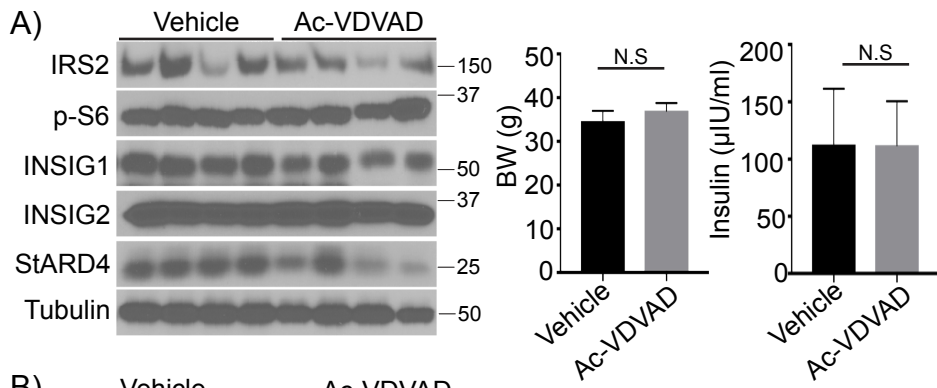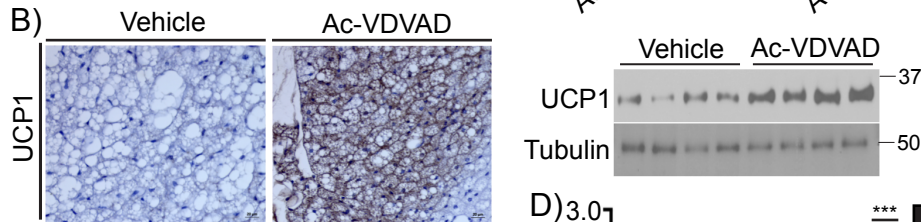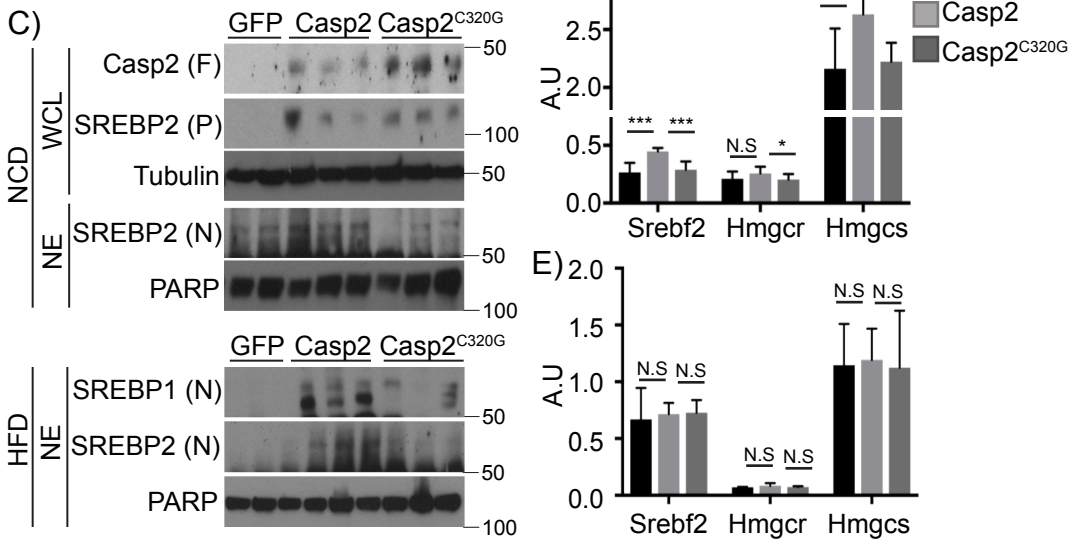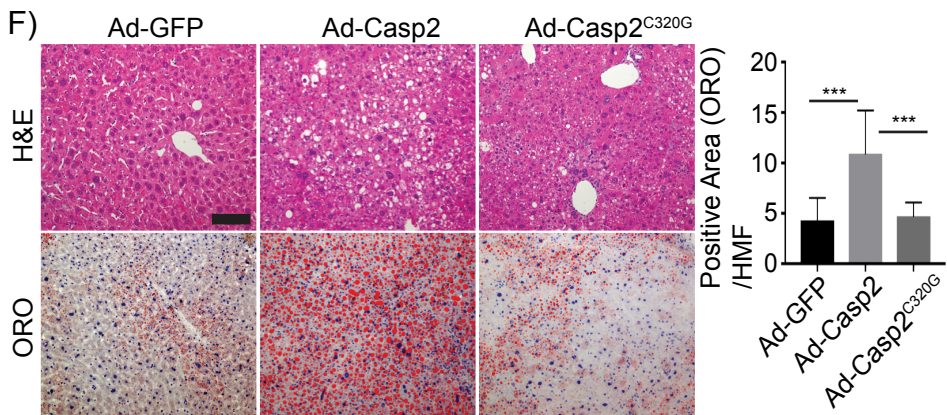

Supplement: NIHMS1505730-supplement-12.pdf [file NIHMS1505730-supplement-12.pdf]

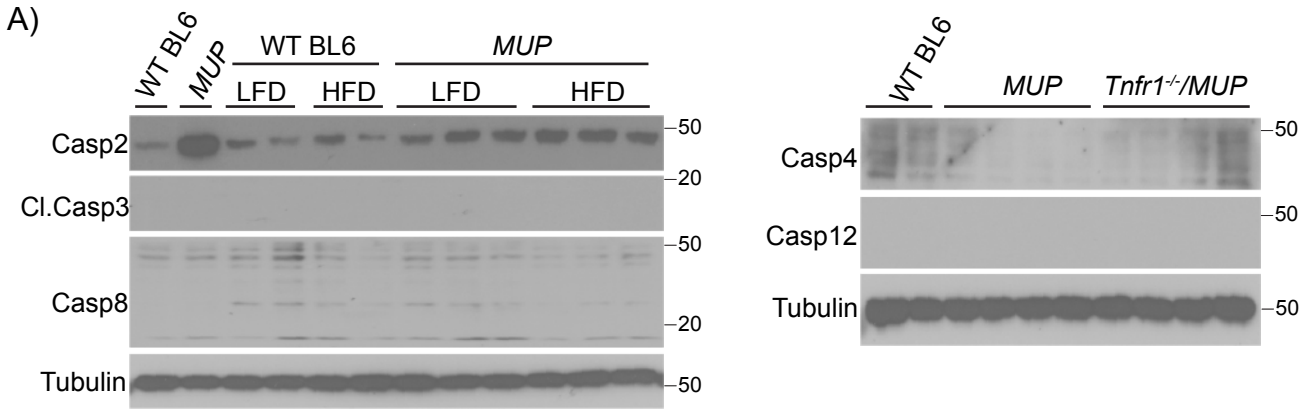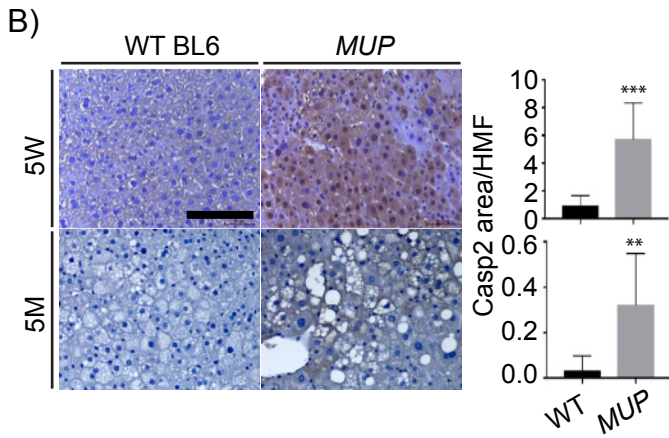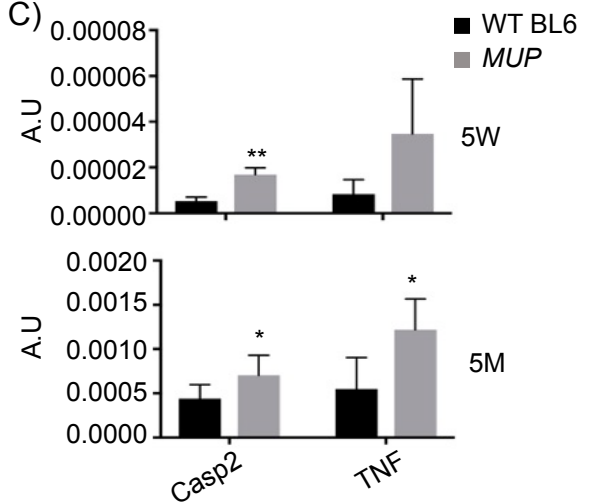

Supplement: NIHMS1505730-supplement-5.pdf [file NIHMS1505730-supplement-5.pdf]

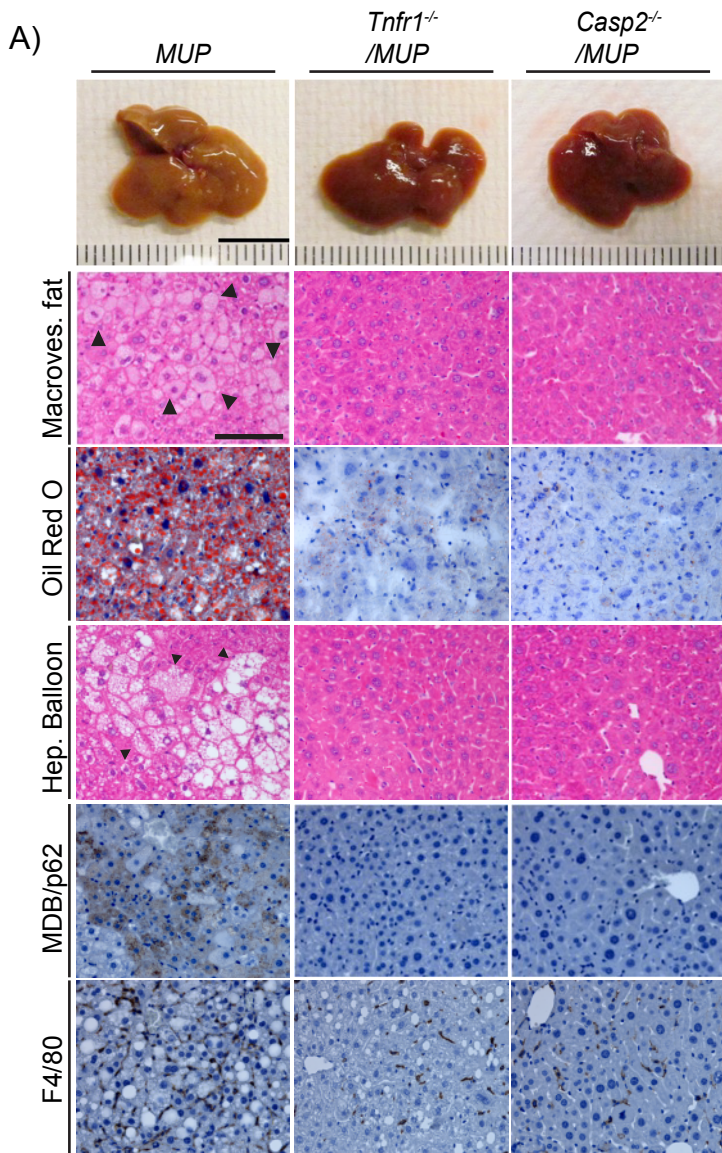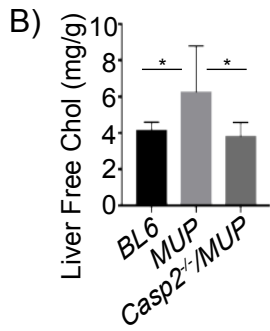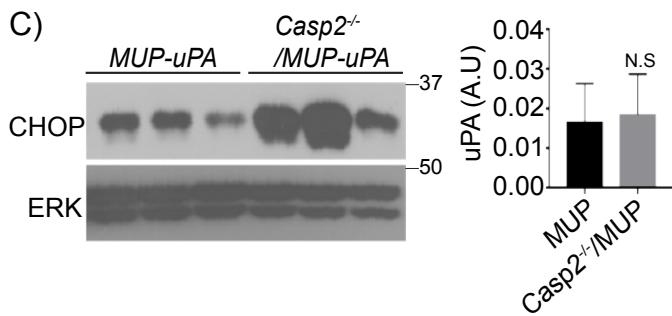

Supplement: NIHMS1505730-supplement-6.pdf [file NIHMS1505730-supplement-6.pdf]

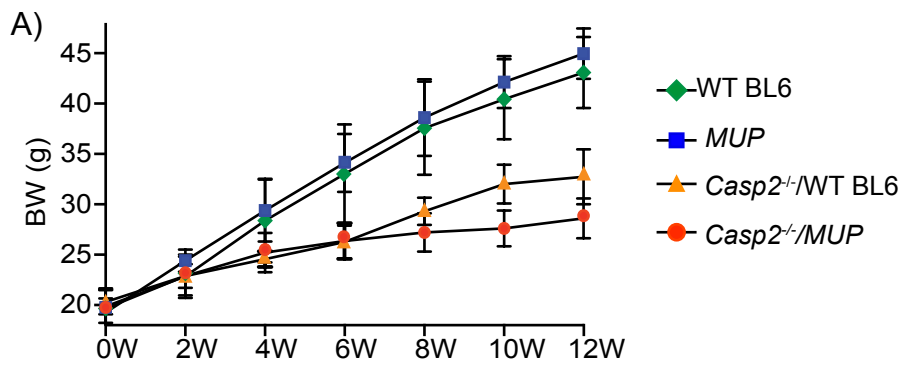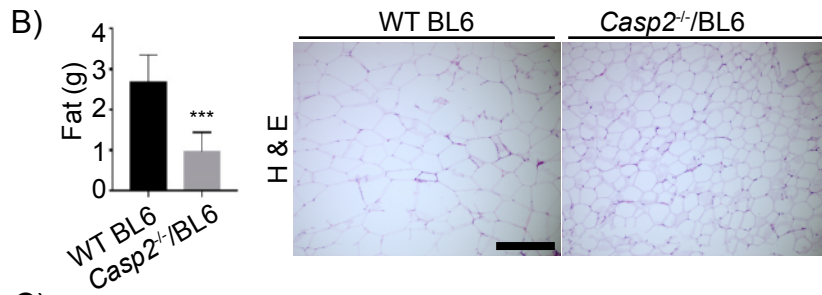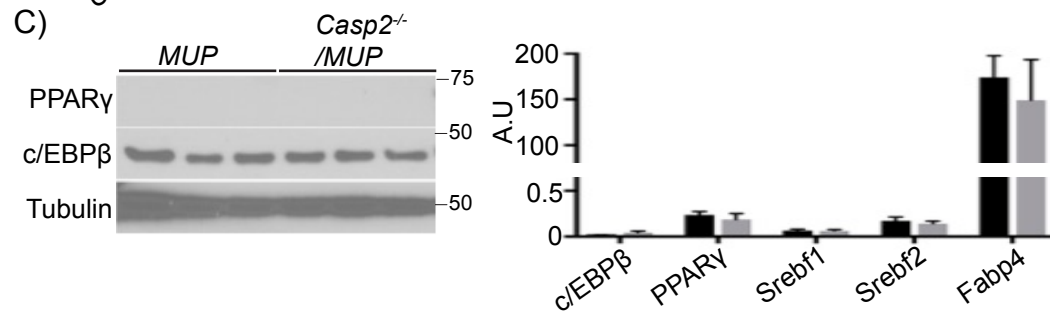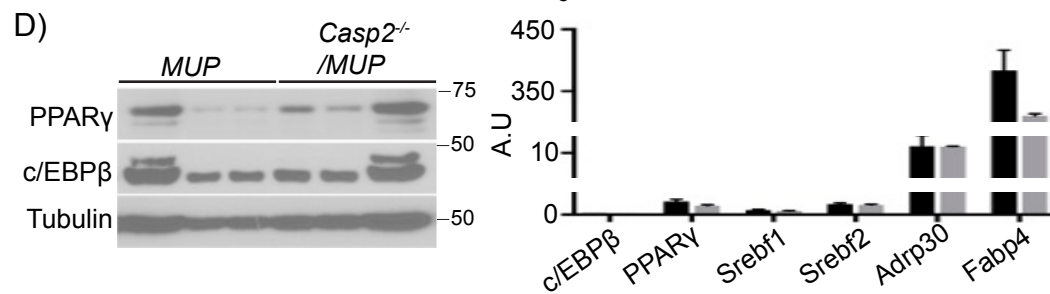

Supplement: NIHMS1505730-supplement-7.pdf [file NIHMS1505730-supplement-7.pdf]

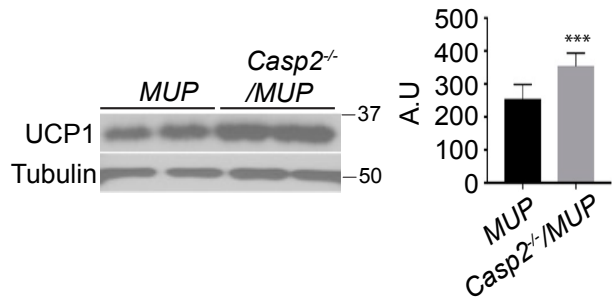

Supplement: NIHMS1505730-supplement-8.pdf [file NIHMS1505730-supplement-8.pdf]

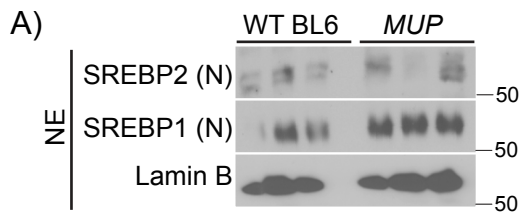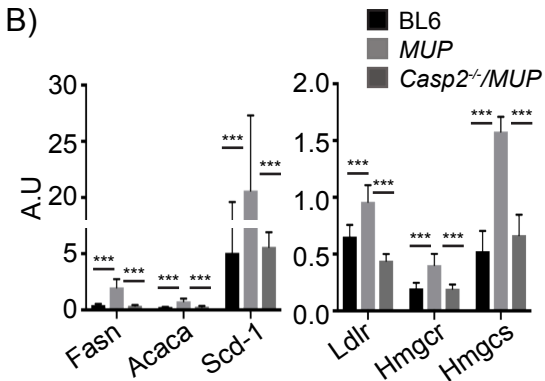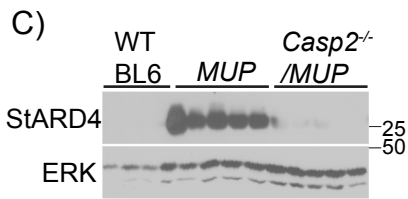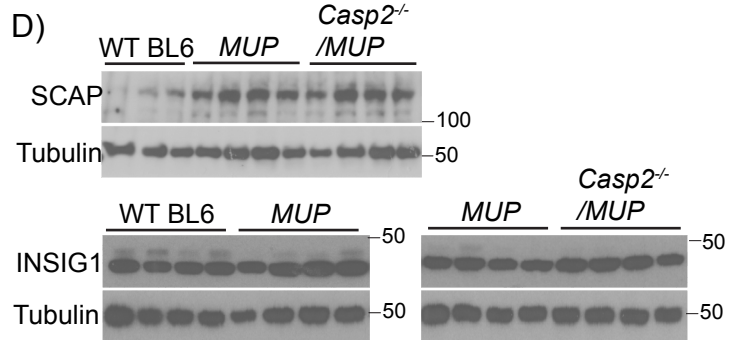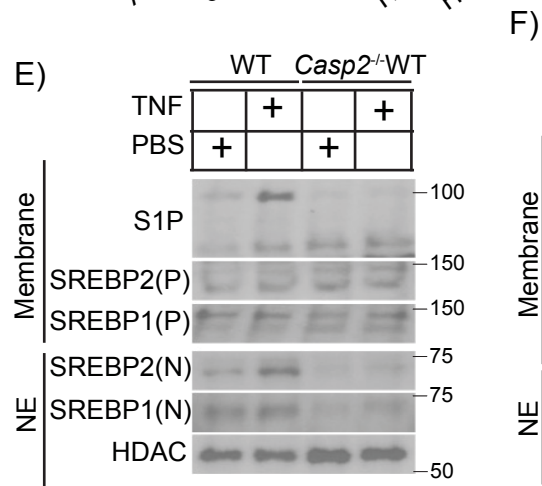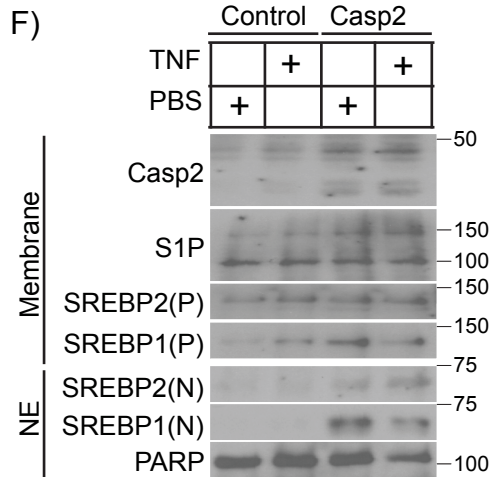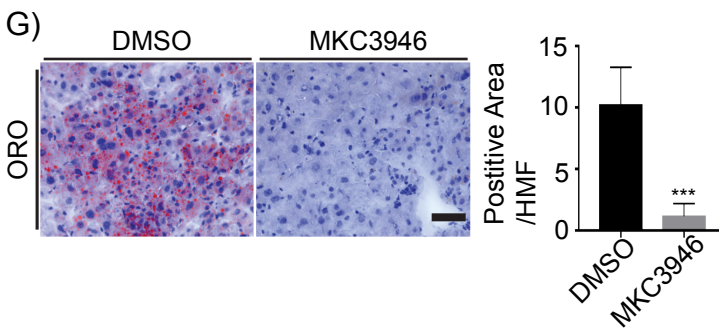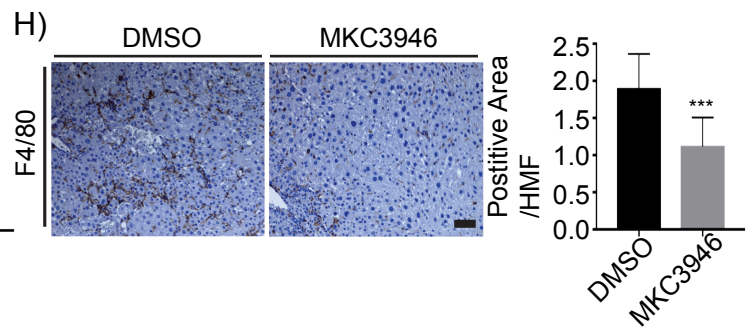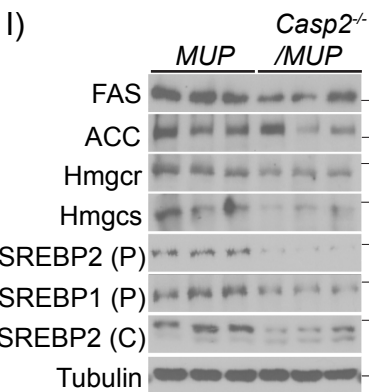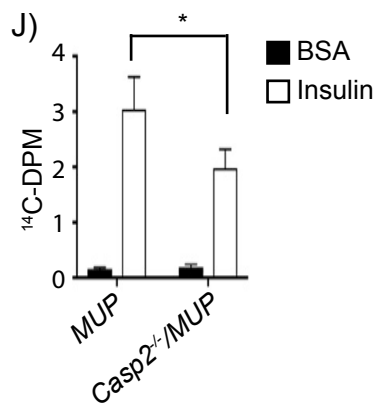

Supplement: NIHMS1505730-supplement-9.pdf [file NIHMS1505730-supplement-9.pdf]
